# 1 Sequence dependence of 2 biomolecular phase separation

3 Benjamin G. Weiner<sup>1</sup>, Yigal Meir<sup>1,2</sup>, Ned S. Wingreen<sup>3,4\*</sup>

\*For correspondence:  
[wingreen@princeton.edu](mailto:wingreen@princeton.edu) (NSW)

4 <sup>1</sup>Department of Physics, Princeton University, Princeton, New Jersey 08544, USA;  
5 <sup>2</sup>Department of Physics, Ben Gurion University of the Negev, Beer-Sheva 84105, Israel;  
6 <sup>3</sup>Department of Molecular Biology, Princeton University, Princeton, New Jersey 08544,  
7 US; <sup>4</sup>Lewis-Sigler Institute for Integrative Genomics, Princeton University, Princeton,  
8 New Jersey 08544, USA

---

10 **Abstract** Cells are home to a wide variety of biomolecular condensates – phase-separated  
11 droplets that lack a membrane. In addition to nonspecific interactions, phase separation  
12 depends on specific binding motifs between constituent molecules. Nevertheless, few rules have  
13 been established on how these specific, heterotypic interactions drive phase separation. Using  
14 lattice-polymer simulations and mean-field theory, we show that the sequence of binding motifs  
15 strongly affects a polymer’s ability to phase separate, influencing both phase boundaries and  
16 condensate properties (e.g. viscosity and polymer diffusion). We find that sequences with large  
17 blocks of a single motif typically form more inter-polymer bonds which promote phase  
18 separation. Notably, the sequence of binding motifs influences phase separation primarily by  
19 determining the conformational entropy of self-bonding by single polymers. This contrasts with  
20 systems where the molecular architecture primarily affects the energy of the dense phase,  
21 providing a new entropy-based mechanism for the biological control of phase separation.

---

## 23 Introduction

24 Understanding how biological systems self-organize across spatial scales is one of the most press-  
25 ing questions in the physics of living matter. It has recently been established that eukaryotic cells  
26 use phase-separated biomolecular condensates to organize a variety of intracellular processes  
27 ranging from ribosome assembly and metabolism to signaling and stress response (*Hyman et al.,*  
28 *2014; Banani et al., 2017; Boeynaems et al., 2018*). Biomolecular condensates are also thought  
29 to play a key role in physically organizing the genome and regulating gene activity (*Hnisz et al.,*  
30 *2017; Sabari et al., 2018; Shin et al., 2018*). How do the properties of these condensates emerge  
31 from their components, and how do cells regulate condensate formation and function? Unlike the  
32 droplets of simple molecules or homopolymers, intracellular condensates are typically composed  
33 of hundreds of molecular species, each with multiple interaction motifs. These interaction motifs  
34 can include folded domains, such as in the nephrin-Nck-N-WASP system for actin regulation (*Li*  
35 *et al., 2012*), or individual amino acids in proteins with large intrinsically disordered regions (IDRs),  
36 such as the germ granule protein Ddx4 (*Nott et al., 2015*). While the precise sequences of these  
37 motifs are believed to play a major role in determining condensates’ phase diagrams and material  
38 properties, the nature of this relation has only begun to be explored (*Brangwynne et al., 2015;*  
39 *Alberti et al., 2019; Hicks et al., 2020*). As a result, it remains difficult to predict the formation,  
40 properties, and composition of these diverse functional compartments.

41 Previous studies have established important principles relating phase separation to the se-  
42 quence of nonspecific interaction domains such as hydrophobic or electrostatic motifs (*Lin et al.,*

2016; Das et al., 2018; McCarty et al., 2019; Statt et al., 2020). However, in many cases condensate formation and function depend on specific interactions which are one-to-one and saturating (Banani et al., 2017). These can include residue-residue bonds, bonds between protein domains, protein-RNA bonds, and RNA-RNA bonds. Such one-to-one interactions between heterotypic domains are ubiquitous in biology, and recent studies have enumerated a large number of examples in both one-component (Wang et al., 2018) and two-component (Ditlev et al., 2018; Xu et al., 2020) systems (e.g. cation-pi bonds between tyrosine and arginine in FUS-family proteins, bonds between protein domains in the SIM-SUMO system). Another important example is RNA phase separation in “repeat-expansion disorders” such as Huntington’s disease and ALS. There, phase separation is driven by specific interactions between nucleotides arranged into regular repeating domains, and it has recently been shown that the repeated sequence pattern is necessary for aggregate formation (Jain and Vale, 2017). In spite of the biological importance of such specific interactions, their statistical mechanical description remains undeveloped. Here, we address the important question: what is the role played by sequence when specific, heterotypic interactions are the dominant drivers of phase separation?

Specifically, we analyzed a model of polymers with specific, heterotypic interaction motifs using Monte Carlo simulations and mean-field theory. We found that motif sequence determines both the size of the two-phase region and dense-phase properties such as viscosity and polymer extension. Importantly, sequence acts primarily by controlling the entropy of self-bonds. This suggests a new paradigm for biological control of intracellular phase separation: when bonds are specific and saturating, the entropy of intramolecular interactions can be just as relevant as the energy of intermolecular interactions.

## Results

How does a polymer’s sequence of interaction motifs affect its ability to phase separate? To address this question, we developed an FCC lattice model where each polymer consists of a sequence of “A” and “B” motifs which form specific, saturating bonds of energy  $\epsilon$  (Fig. 1(a) and 1(b)). Monomers on adjacent lattice sites also have nonspecific interaction energy  $J$ . For each sequence, we determined the phase diagram, which describes the temperatures and polymer concentrations at which droplets form. To enable full characterization of the phase diagram including the critical point, we used Monte Carlo simulations in the Grand Canonical Ensemble (GCE): the 3D conformations of the polymers are updated using a predefined move-set, and polymers are inserted/deleted with chemical potential  $\mu$ . (See Methods and Materials for details.) For each sequence, we determined the critical point (temperature  $T_c$  and chemical potential  $\mu_c$ ). Then for each  $T < T_c$  we located the phase boundary, defined by the value  $\mu^*$  for which the dilute and dense phases have equal thermodynamic weight. Around this value of  $\mu$ , the system transitions back and forth between the two phases throughout the simulation, leading to a polymer number distribution  $P(N)$  that has two peaks with equal weights (Fig. 1(c)) (Panagiotopoulos et al., 1998). The dilute and dense phase concentrations  $\phi_{\text{dilute}}$  and  $\phi_{\text{dense}}$  are the means of these two peaks. Multicanonical sampling was employed to adequately sample transitions (Methods and Materials).

We first constructed phase diagrams for polymers with the six sequences shown in Fig. 1(a), all with  $L = 24$  motifs arranged in repeating domains, and all with equal numbers of A motifs and B motifs ( $a = b = 12$  where  $a$  and  $b$  are the numbers of A and B motifs in a sequence). Each simulation contains polymers of a single sequence, and the sequences differ only in their domain sizes  $\ell$ . Figure 2(a) shows the resulting phase diagrams, which differ dramatically by domain size, e.g. the  $T_c$  values for  $\ell = 2$  and  $\ell = 12$  differ by 20%. The absolute magnitude of the effect depends on the interaction energy scale  $\epsilon$ , but we note that if the  $T_c$  for  $\ell = 12$  were in the physiological range around 300K, the corresponding 60K difference would render the condensed phase of  $\ell = 2$  inaccessible in most biological contexts. Despite this wide variation, Fig. 2(b) shows that rescaling by  $T_c$  and  $\phi_c$  causes the curves to collapse. This is expected near the critical point, where all sequences share the behavior of the 3D Ising universality class (Panagiotopoulos et al., 1998), but the con-

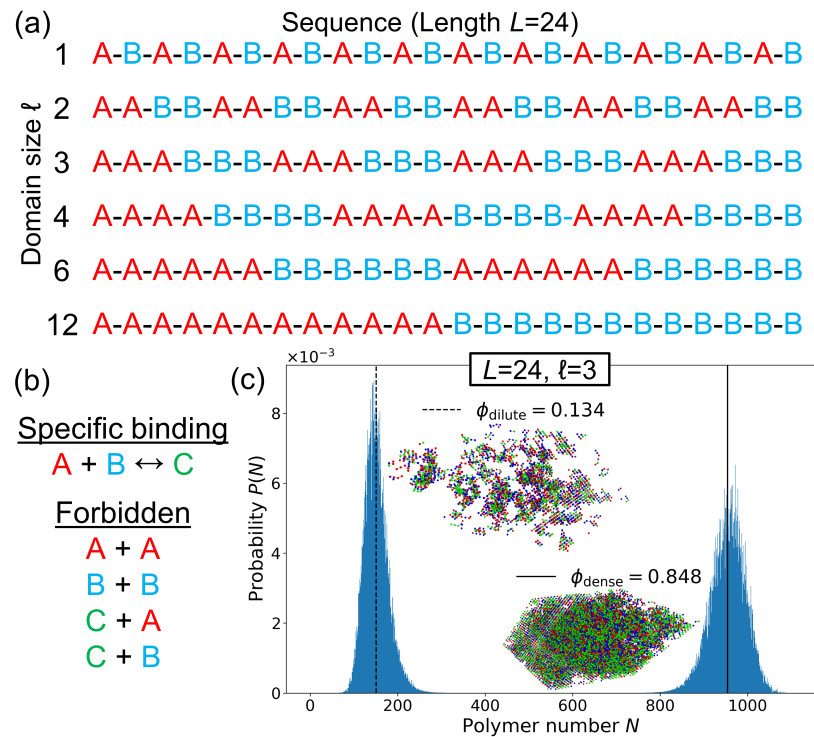

**Figure 1.** Lattice model for phase separation by polymers with one-to-one interacting motifs. (a) Each polymer is defined by its sequence of motifs, which come in types “A” (red) and “B” (blue). The class of sequences shown consists of repeated domains of As and Bs, labeled by their domain size  $\ell$ . (b) In lattice simulations, an A and a B motif on the same lattice site form a specific, saturating bond (green) with binding energy  $\epsilon$ . Monomers of any type on adjacent lattice sites have an attractive nonspecific interaction energy  $J = 0.05\epsilon$ . A-A and B-B overlaps are forbidden. (c) Polymer number distribution  $P(N)$  at the phase boundary of the  $\ell = 3$  sequence ( $\beta\epsilon = 0.9287$ ,  $\mu = -9.9225\epsilon$ ). At fixed  $\mu$  the system fluctuates between two phases. *Inset:* Snapshots of the GCE (fixed  $\mu$ ) simulation at  $\phi_{\text{dilute}}$  and  $\phi_{\text{dense}}$ .

93 continued nearly exact data collapse indicates that  $(T_c, \phi_c)$  fully captures the sequence-dependence of  
94 the phase diagram.

95 Why does the sequence of binding motifs have such a strong effect on phase separation? Im-  
96 portantly, sequence determines the entropy of intra-polymer bonds, i.e. the facility of a polymer  
97 to form bonds with itself. This is quantified by the single-polymer density of states  $g(s)$ : for each se-  
98 quence,  $g(s)$  counts the number of 3D conformations with  $s$  self-bonds. For short polymers,  $g(s)$  can  
99 be enumerated, whereas for a longer polymers, it can be extracted from Monte Carlo simulations.  
100 Figure 2(c) shows  $g(s)$  for each of the domain sequences, obtained from Monte Carlo simulations.  
101 Sequences with small domain sizes have many more conformations available to them at all values  
102 of  $s$ . Intuitively, a sequence like  $\ell = 2$  allows a polymer to make many local bonds, whereas a  
103 sequence like  $\ell = 12$  cannot form multiple bonds without folding up globally like a hairpin. Such  
104 hairpin states are thermodynamically unfavorable at these temperatures due to the low confor-  
105 mational entropy, so it is more favorable for polymers like  $\ell = 12$  to phase separate and form  
106 trans-bonds with others, leading to a high  $T_c$  value. Even when  $T < T_c$  so that low-energy states  
107 with many bonds are favored, large-domain sequences have large two-phase regions because  $g(s)$   
108 is small for all  $s$ . Thus, polymers with large domains form condensates over a much wider range  
109 of temperatures and concentrations.

110 This intuition can be captured by a simple mean-field theory that incorporates only single-  
111 polymer properties, namely  $g(s)$  and the number of A and B motifs per polymer,  $a$  and  $b$ . We  
112 calculate the free energy density of a state where each polymer forms  $s$  self-bonds and  $t$  trans-  
113 bonds (bonds with other polymers). We make two mean-field simplifications: 1) every polymer

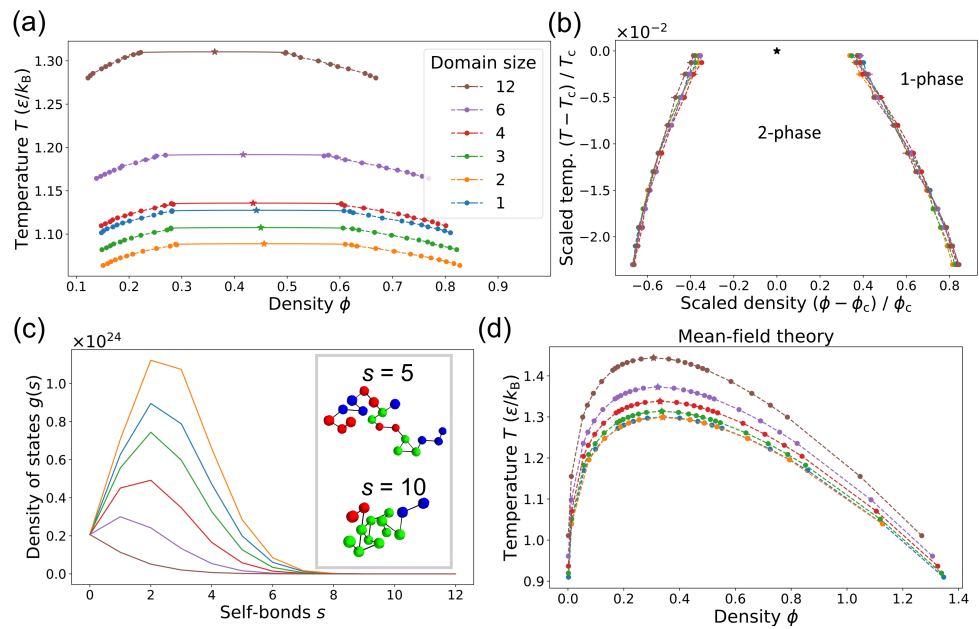

**Figure 2.** The sequence of binding motifs strongly affects a polymer’s ability to phase separate. (a) Binodal curves defining the two-phase region for the six sequences of length  $L = 24$  shown in Fig. 1(a). Stars indicate the critical points and the solid curves are fits to scaling relations for the 3D Ising universality class. Mean  $\pm$  SD for three replicates. (Uncertainties are too small to see for most points.) Color key applies to all panels. (b) When rescaled by the critical temperature  $T_c$  and critical density  $\phi_c$ , the phase boundaries in (a) collapse, even far from the critical point. (c) The tendency to phase separate is inversely related to the density of states  $g(s)$ , i.e. the number of ways a given sequence can form  $s$  bonds with itself. Inset: Snapshots of  $\ell = 3$  polymer with  $s = 5$  (top) and  $s = 10$  (bottom). Black lines show the polymer backbone. (d) Phase boundaries from mean-field theory using  $g(s)$  (Eq. 1).

114 has the mean number of trans-bonds  $\bar{t}$ , and 2) each polymer interacts with the others through a  
 115 mean-field background of independent motifs. In contrast, the self-interaction is described by the  
 116 full density of states  $g(s)$  extracted from single-polymer simulations. This leads to the following  
 117 free energy density (see Appendix 1 for derivation):

$$f(\bar{s}, \bar{t}) \equiv \frac{F}{k_B T V} = f_{\text{steric}}(\bar{s}, \bar{t}) + f_{\text{trans}}(\bar{s}, \bar{t}) + \beta \chi \phi^2 - \frac{\phi}{L} \left( \log \sum_s g(s) e^{ws} \right) + \frac{\phi}{L} w \bar{s} - \frac{\phi}{L} \beta \epsilon \left( \bar{s} + \frac{\bar{t}}{2} \right), \quad (1)$$

118 where  $V$  is the number of lattice sites,  $\chi$  is the nonspecific-interaction parameter,

$$f_{\text{steric}} \equiv \frac{\phi}{L} \log \frac{\phi}{L} + \left( 1 - \phi \frac{\langle l \rangle}{L} \right) \log \left( 1 - \phi \frac{\langle l \rangle}{L} \right) + \frac{\phi}{L} \left( \langle l \rangle - 1 \right), \quad \langle l \rangle \equiv L - \bar{s} - \bar{t}/2, \quad (2)$$

119 and

$$f_{\text{trans}} \equiv \frac{\phi}{L} \left( y(a) + y(b) + \frac{\bar{t}}{2} \log \frac{\bar{t}}{2} + \frac{\bar{t}}{2} (1 - \log \frac{\phi}{L}) \right), \quad (3)$$

$$y(x) \equiv (x - \bar{s} - \bar{t}/2) \log(x - \bar{s} - \bar{t}/2) - (x - \bar{s}) \log(x - \bar{s}).$$

120  $f_{\text{steric}}$  is the translational contribution from the number of ways to place polymers without overlap  
 121 and  $f_{\text{trans}}$  is the entropy of forming  $\bar{t}$  trans-bonds given  $\bar{s}$  self-bonds, derived from the combinatorics  
 122 of pairing independent motifs. The fourth term in Eq. 1 accounts for the self-bonding entropy,  
 123 where  $w$  is the self-bond weight chosen to self-consistently enforce  $\sum_i s_i / N = \bar{s}$ . The next term is  
 124 the Legendre transform compensating for  $w$ . (This allows us to estimate the entropy of  $\bar{s}$  without  
 125 assuming that  $s_i = \bar{s} \forall i$ . The procedure is akin to introducing a “chemical potential”  $w$  which fixes  
 126 the mean number of self-bonds.) In the thermodynamic limit the partition function is dominated by  
 127 the largest term, so we minimize Eq. 1 with respect to  $\bar{s}$  and  $\bar{t}$  at each  $\phi$  to yield  $f(\phi)$  and determine  
 128 the phase diagram.

129 Figure 2(d) shows the mean-field phase diagrams. In spite of the theory's approximations, it cap-  
 130 tures the main patterns observed in the full simulations. Specifically, sequences with larger motif  
 131 domains have larger two-phase regions and these extend to higher temperatures. (The mean-field  
 132  $T_c$  values differ from the simulations, but these could be tuned by the nonspecific-interaction pa-  
 133 rameter  $\chi$ . Density fluctuations make it difficult to map  $\chi$  to  $J$ , so we use the mean-field relation  
 134  $\chi = -VJz/2$  for simplicity.) Rescaling by  $T_c$  and  $\phi_c$  also causes the mean-field phase boundaries  
 135 to collapse (Appendix 4). Intriguingly, the mean-field theory does not correctly place the  $\ell = 1$  se-  
 136 quence in the  $T_c$  hierarchy. The single-polymer density of states  $g(s)$  suggests that  $\ell = 1$  should be  
 137 similar to  $\ell = 2$ , but its  $T_c$  is closer to  $\ell = 4$ . We trace this discrepancy to trans-bond correlations  
 138 in the dense phase: the  $\ell = 1$  sequence tends to form segments of multiple bonds rather than  
 139 independent bonds (see Appendix 2 for details). Overall, the success of the theory demonstrates  
 140 that motif sequence mainly governs phase separation through the entropy of self-interactions. We  
 141 capture this dependence, as well as corrections due to dense-phase correlations, in a simple "con-  
 142 densation parameter" described below.

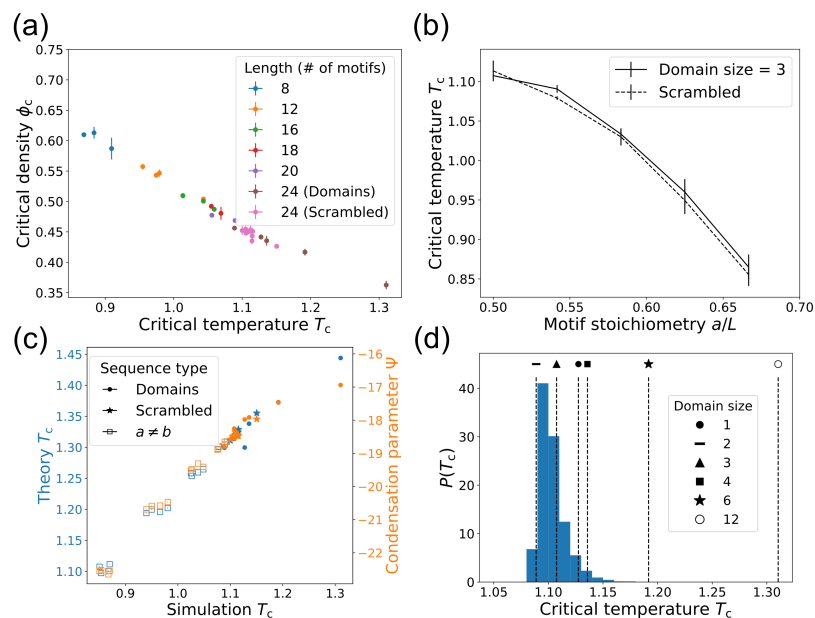

**Figure 3.** Ability to phase separate is determined by the sequence of binding motifs for polymers of different lengths, patterns, and motif stoichiometries. (a)  $T_c$  and  $\phi_c$  for  $L = 24$  polymers with scrambled sequences and domain sequences of various lengths. Mean  $\pm$  SD over three replicates. (Temperature uncertainties are too small to see in (a) and (c).) (b)  $T_c$  as a function of motif stoichiometry  $a/L$ . The solid curve corresponds to  $\ell = 3$  sequences where a number of B motifs are randomly mutated to A motifs, and the dashed curve shows scrambled sequences. Mean  $\pm$  SD over four different sequences. (c)  $T_c$  from Monte Carlo simulations versus mean-field theory (blue) and condensation parameter (orange) for domain sequences, scrambled sequences, and sequences with unequal motif stoichiometry, all  $L = 24$ . Mean  $\pm$  SD over three replicates for simulation  $T_c$ . (d) Distribution of  $T_c$  values for 20,000 random sequences of length  $L = 24$  with  $a = b$ , calculated from  $\Psi$  values and the linear  $T_c$  versus  $\Psi$  relation for domain sequences. Domain sequence  $T_c$  values are marked.

143 Do these conclusions still hold if the motifs are not arranged in regular domains, and how do  
 144 polymer length and motif stoichiometry affect phase separation? To address these questions, we  
 145 located the critical points for three new types of sequences: 1) Length  $L = 24$  sequences with  $a =$   
 146  $b = 12$  in scrambled order, 2) domain sequences with  $L \neq 24$ , and 3) sequences with  $L = 24$  but  $a \neq b$ .  
 147 Each simulation contains only polymers of a single sequence. We find that the  $T_c$  hierarchy with  
 148 respect to domain size  $\ell$  is preserved across sequence lengths, so domain size is a robust predictor  
 149 of phase separation (Appendix 4, Fig. 12). Figure 3(a) shows  $T_c$  and  $\phi_c$  for the scrambled  $L = 24$   
 150 sequences and for domain sequences of various lengths.  $T_c$  and  $\phi_c$  are negatively correlated across

151 all sequences because for low- $T_c$  sequences, trans-bonds – and consequently, phase separation –  
152 only become favorable at higher polymer density.

153 The dashed curve in Fig. 3(b) shows  $T_c$  for scrambled sequences with unequal motif stoichiometry.  
154  $T_c$  decreases as the motif imbalance grows because the dense phase is crowded with un-  
155 bonded motifs, making phase separation less favorable. How does this crowding effect interplay  
156 with the previously observed effect of  $g(s)$ ? Scrambled sequences are clustered near the  $\ell = 3$   
157 sequence in  $(T_c, \phi_c)$  space (Appendix 4, Fig. 11), so we generated sequences by starting with  $\ell = 3$   
158 and randomly mutating B motifs into A motifs (Fig. 3(b), solid curve). The  $\ell = 3$  mutants follow the  
159 same pattern as the scrambled sequences, indicating that self-bond entropy and stoichiometry are  
160 nearly independent inputs to  $T_c$ . This arises because motif flips have a weak effect on  $g(s)$  but a  
161 strong effect on dense phase crowding, giving cells two independent ways to control condensate  
162 formation through sequence.

163 The mean-field theory of Eq. 1 also captures the behavior of these more general sequences, as  
164 shown in Fig. 3(c). The critical temperatures from theory (blue markers) correlate linearly with the  
165 simulation  $T_c$  values. (The magnitude differs, but this is tuned by the strength of nonspecific inter-  
166 actions.) This agreement reinforces the picture that  $T_c$  is mainly governed by the relative entropy  
167 of intra- and inter-polymer interactions. The former is captured by  $g(s)$  and the latter depends on  
168 the motif stoichiometry. To capture these effects in a single number, we propose a condensation  
169 parameter  $\Psi$  which correlates with a sequence's ability to phase separate (see Appendix 3 for a  
170 heuristic derivation):

$$\Psi \equiv -\log \left( \frac{1}{(r_A)^b (r_B)^a} \sum_s \frac{g(s)}{(4\langle P_{\text{corr}} \rangle)^{s/2}} \right), \quad (4)$$

171 where  $r_A = a/L$  is the fraction of motifs that are A (and likewise for  $r_B$ ) and  $\langle P_{\text{corr}} \rangle$  is a simple met-  
172 ric for trans-bond correlations (See Appendix 2). A sequence with large  $\Psi$  has a high  $T_c$  because  
173 the dense phase is relatively favorable due to low self-bonding entropy, strong dense-phase cor-  
174 relations, or balanced motif stoichiometry. As shown in Fig. 3(c) (orange markers), this accurately  
175 captures the phase separation hierarchy of  $T_c$ , including the correlation-enhanced  $T_c$  of the  $\ell = 1$   
176 sequence.

177 Are domain sequences special? The space of possible sequences is much larger than can be ex-  
178 plored via Monte Carlo simulations. However, we can use the condensation parameter to estimate  
179  $T_c$  for any sequence without additional simulations. First, we estimate  $g(s)$  analytically and use this  
180 to approximate  $\Psi$  for new sequences. Then we use a linear fit of  $\Psi$  to the known  $T_c$  values for the  
181 domain sequences to estimate the critical temperature (details in Appendix 3). Figure 3(d) shows  
182 the distribution of critical temperatures calculated in this way for 20,000 random sequences with  
183  $a = b = 12$ . Strikingly, the distribution is sharply peaked at low  $T_c$ , similar to the domain sequences  
184 with  $\ell = 2$  or  $\ell = 3$ . If particular condensates with high  $T_c$  are biologically beneficial, then evolution  
185 or regulation could play an important role in generating atypical sequences like  $\ell = 12$  with large  
186 two-phase regions.

187 The sequence of specific-interaction motifs influences not only the formation of droplets, but  
188 also their physical properties and biological function. Figure 4(a) shows the number of self-bonds  
189 in the dense phase relative to scaled temperature  $|T - T_c|/T_c$ . Density fluctuates in the GCE, so each  
190 point is averaged over configurations with  $\phi$  within 0.01 of the phase boundary, and this density is  
191 indicated via the marker color (marker legend in 4(c)). The sequence ordering of self-bonds in the  
192 dense phase matches the sequence ordering of the single-polymer  $g(s)$ , indicating that sequence  
193 controls intrapolymer interactions even in the condensate. Figure 4(b) shows the number of trans-  
194 bonds in the dense phase, plotted as in (a). Larger domains lead to more trans-bonds, even though  
195 the droplets are less dense. As temperature is reduced – and thus density is increased – the number  
196 of trans-bonds increases. Interestingly, even though the phase boundaries collapse to the same  
197 curve (Fig. 2(b)), different sequences lead to droplets with very different internal structures.

198 These structural differences will affect the physical properties of the dense phase. The timescales  
199 of a droplet's internal dynamics will determine whether it behaves more like a solid or a liquid. We

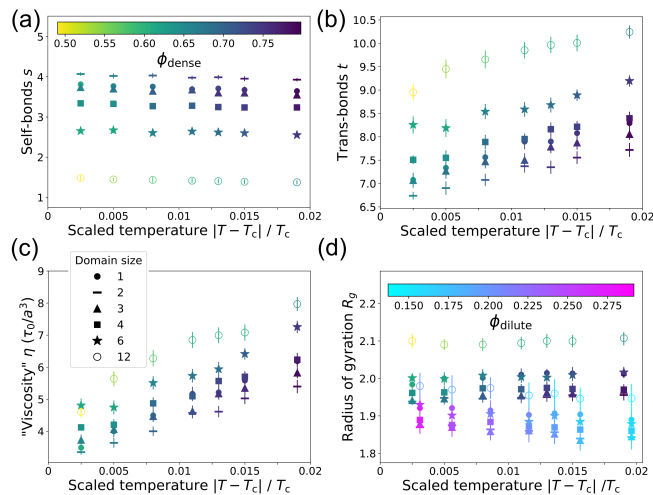

**Figure 4.** The structure of the dense phase depends on the motif sequence. (a) Number of self-bonds  $s$  in the dense phase as a function of reduced temperature for domain sequences (symbols as in (c)). Each point shows  $s$  (mean  $\pm$  SD) over all configurations with  $|\phi - \phi_{\text{dense}}| \leq 0.01$ . Color bar: droplet density. (b) Number of trans-bonds  $t$  (bonds with other polymers) versus temperature as in (a). (c) “Viscosity” (Eq. 5) of the dense phase, shown as in (a). Symbol key applies to all panels. (d) Radius of gyration  $R_g$  of polymers in the dense phase (shown as in (a)) and in the dilute phase. Dilute-phase points show  $R_g$  (mean  $\pm$  SD) over all configurations with  $|\phi - \phi_{\text{dilute}}| \leq 0.01$ . They share reduced temperatures with the dense phase points but are shifted for clarity. Color bar: dilute phase density.

200 might expect denser droplets to have slower dynamics, so the  $\ell = 1$  and  $\ell = 2$  sequences would  
 201 be more solid-like. However, the extra inter-polymer bonds at large  $\ell$  will slow the dynamics. To  
 202 disentangle these effects, we estimate the viscosity and polymer-diffusivity by modeling the dense  
 203 phase as a viscoelastic polymer melt with reversible cross-links formed by trans-bonds. Then the  
 204 viscosity is expected to scale as (*Rubinstein and Semenov, 2001*)

$$\eta \sim G\tau = \left( k_B T \frac{\phi}{m^3 L} \right) \left( \tau_b \bar{t}^2 \right), \quad (5)$$

205 where  $G$  is the elastic modulus,  $\tau$  is the relaxation time of the polymer melt, and  $m$  is the monomer  
 206 length.  $\tau$  depends on the trans-bonds per polymer  $\bar{t}$  and the bond lifetime  $\tau_b = \tau_0 \exp(\beta\epsilon)$ , where  $\tau_0$  is  
 207 a microscopic time which we take to be sequence-independent. Figure 4(c) shows the dense-phase  
 208 viscosity calculated using in Eq. 5 the  $\bar{t}$  and  $\phi_{\text{dense}}$  obtained from simulation. We find that sequences  
 209 with large domains have more viscous droplets due to the strong dependence on inter-polymer  
 210 bonds, in spite of their substantially lower droplet density. By the same arguments leading to  
 211 Eq. 5, diffusivity scales as  $1/\bar{t}$ , so polymers with large domains will also diffuse more slowly within  
 212 droplets (Appendix 4, Fig. 13). Thus trans-bonds are the main repository of elastic “memory” in the  
 213 droplet.

214 The motif sequence also affects the polymer radius of gyration in both phases (Fig. 4(d)). In the  
 215 dense phase, polymers with large domains adopt expanded conformations which allow them to  
 216 form more trans-bonds. Polymers of all sequences are more compact in the dilute phase, where  
 217 there are fewer trans-bonds and nonspecific interactions with neighbors. Thus self-bonds cause  
 218 polymers to contract, while trans-bonds cause them to expand.

## 219 Discussion

220 In summary, we developed a simple lattice-polymer model to study how the sequence of specific-  
 221 interaction motifs affects phase separation. We found that motif sequence determines the size  
 222 of the two-phase region by setting the relative entropy of intra- versus inter-molecular bonds. In  
 223 particular, large domains of a single motif disfavor self-bonds and thus favor phase separation.

224 This is consistent with recent experimental (*Pak et al., 2016*) and theoretical (*Lin et al., 2016; Mc-*  
225 *Carty et al., 2019*) studies on coacervation (phase separation driven by electrostatics) where small  
226 charge-domains lead to screening of the attractive forces driving aggregation. However, electro-  
227 static interactions (generic, longer-range, promiscuous) are qualitatively very different from the  
228 interactions in our model (specific, local, saturating). This points to a different underlying mech-  
229 anism: in the former, sequence primarily influences the electrostatic energy of the dense phase,  
230 but in the latter, sequence controls the conformational entropy of the dilute phase. Thus specific  
231 interactions provide a distinct physical paradigm for the control of intracellular phase separation.  
232 While our dilute phase concentrations are large relative to experimental values due to weak non-  
233 specific interactions and the discrete lattice, we expect these sequence-dependent patterns to be  
234 quite general. If anything, the self-bond entropy will be even more important at low  $\phi_{\text{dilute}}$ .

235 We then analyzed how sequence influences condensates' physical properties such as viscos-  
236 ity and diffusivity. We found that motif sequence strongly affects both droplet density and inter-  
237 polymer connectivity, and, in particular, that sequences with large domains form more viscous  
238 droplets with slower internal diffusion. All sequences expand in the dense phase to form more  
239 trans-bonds, and small-domain sequences are the most compact. This contrasts with results for  
240 single polyampholyte chains, where "blocky" sequences with large domains are more compact (*Das*  
241 *and Pappu, 2013; Sawle and Ghosh, 2015*). The difference arises because our system includes many  
242 polymers interacting with each other and because hairpins are less favored by specific bonds than  
243 by longer-range electrostatic interactions.

244 Taken together, these results suggest that motif sequence provides cells with a means to tune  
245 the formation and properties of intracellular condensates. For example, motif stoichiometry could  
246 be an active regulatory target – a cell could dissolve droplets by removing just a few binding motifs  
247 per polymer through post-translational modifications. The negative correlation between  $T_c$  and  $\phi_c$   
248 provides another regulatory knob: if a particular condensate density is required at fixed tempera-  
249 ture, this can be achieved by either tuning the binding strength or modifying the sequence. How-  
250 ever, the physics also implies biological constraints: the same trans-bonds that drive condensation  
251 for high- $T_c$  sequences also lead to high viscosity, which may not be functionally favorable. Key pre-  
252 dictions of our model may be tested experimentally using synthetic biopolymers with interaction  
253 motifs arranged in domains of different sizes (e.g. using the SIM-SUMO or SH3-PRM systems), then  
254 quantifying the relationship between domain size,  $T_c$  or  $\phi_{\text{dilute}}$ , or viscosity/diffusivity.

255 We have used a simple model of biological condensates to show how the sequence of specific-  
256 interaction motifs affects phase separation, thus linking the microscopic details of molecular com-  
257 ponents to the emergent properties relevant for biological function. What lessons are likely to  
258 generalize beyond the details of the model? When nonspecific interactions dominate, forming a  
259 dense droplet has a large energetic payoff. When interactions are specific and saturating, however,  
260 the energy change is limited and the conformational entropy is expected to play a bigger role. For  
261 example, in two-component systems the conformational entropy of small oligomers can stabilize  
262 the dilute phase (*Xu et al., 2020; Zhang et al., in press*). Here, we have shown that the conforma-  
263 tional entropy of self-interactions can play a similar role, and we use the density of states  $g(s)$  to  
264 connect sequence and entropy. Can this framework be extended to other molecular architectures  
265 where specific self-interactions are important? For example, mRNA secondary structure can con-  
266 trol whether a transcript remains in the dilute phase or enters a protein condensate (*Langdon et al.,*  
267 *2018*). RNA self-interactions could also drive aggregation in disease. Transcripts with nucleotide  
268 repeats phase separate more readily than scrambled sequences (*Jain and Vale, 2017*), and it will  
269 be interesting to ask how this relates to the robust phase separation of large-domain sequences  
270 in the present work. Understanding the general role of the entropy of self-interactions will prove  
271 useful if it allows us to gain insight into biomolecular phase separation by simply analyzing the  
272 properties of single molecules or small oligomers rather than necessarily tackling the full many-  
273 body problem. Many open questions remain, however, and we hope our work encourages further  
274 research across a range of theoretical and experimental systems.



## 275 Acknowledgments

276 We thank O. Kimchi, E. King, and J. Steinberg for valuable conversations about RNA phase separation. This work was supported in part by the National Science Foundation, through Center for  
277 the Physics of Biological Function Grant PHY-1734030 (to B.G.W.), and National Institutes of Health  
278 Grant R01 GM140032 (to N.S.W.).  
279

## 280 Methods and Materials

281 We performed Monte Carlo simulations in the Grand Canonical Ensemble on a  $30 \times 30 \times 30$  FCC lattice,  
282 corresponding to a volume of  $V = 30^3$  lattice sites, with periodic boundary conditions. When “A”  
283 and “B” monomers occupy the same site, they form a bond with energy  $\epsilon$ . Other overlaps are  
284 forbidden. When two monomers of any type occupy adjacent lattice sites, they have an attractive  
285 nonspecific interaction energy  $J$ . Thus each lattice site  $i$  has a bond occupancy  $q_i \in [0, 1]$  and a  
286 motif occupancy  $r_i \in [0, 1, 2]$ . The Hamiltonian for our system is therefore

$$H = -\epsilon \sum_i q_i - J \sum_{\{i,j\}} r_i r_j, \quad (6)$$

287 where the brackets indicate summation over adjacent lattice sites. Each simulation has fixed control  
288 variables  $\beta = 1/k_B T$  and polymer chemical potential  $\mu$ . We use simulated annealing to cool the  
289 system to the final temperature, and after reaching that temperature to ensure the system has  
290 thermalized we only use data from the last 80% of steps. The total number of Monte Carlo steps  
291 varies, but is around  $4.5 \cdot 10^8$  for critical point simulations. In each Monte Carlo step, we update the  
292 system configuration by proposing a move from the move-set defined in Fig. 5. Moves (a-c) are  
293 standard polymer moves. We include contraction and expansion moves (Fig. 5(d) and (e)) which  
294 allow contiguous motifs to form and break bonds. The FCC lattice has coordination number  $z = 12$ ,  
295 so there are 12 states that can transition into any one contracted state. Thus it is necessary to  
296 propose expansions at 12 times the rate of contractions to satisfy detailed balance. We also allow  
297 clusters of polymers connected by A-B overlap to translate by one site so long as no overlap bonds  
298 are formed or broken.

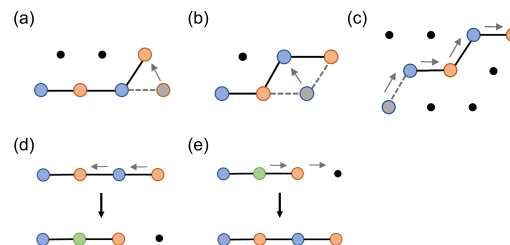

**Figure 5.** The polymer moves used to update Monte Carlo simulations at each step. We also allow translation of connected clusters of polymers and insertion/deletion of polymers. (a) End move. (b) Corner Reptation. (d) Contraction. (e) Expansion.

299 To include insertions and deletions of polymers, we assume the existence of a reservoir of poly-  
300 mers of chemical potential  $\mu$ , which we can adjust. Because inserting a polymer tends to increase  
301 the configurational entropy of the system, we adopt the common convention of shifting  $\mu$  by the  
302 entropy of an ideal polymer:  $\mu \equiv \mu_0 + \ln(z + 1)^{L-1}$ , where the “+1” in  $z + 1$  comes from allowing the  
303 “walk” to remain on the same site and form a contiguous bond (see Fig. 5(d)-(e)). We then remove  
304 the shift with a prefactor in the acceptance probabilities (Eq. 12). This convention allows us to  
305 simulate the dilute phase without setting  $\mu$  to a large negative value.

306 In our Monte Carlo move set, we allow for the deletion of any polymer, and require that insertion  
307 moves satisfy detailed balance with respect to deletions. This still allows for considerable  
308 freedom in the insertion algorithm. Naively, we might insert polymers as random walks, but for  
309 a dense system most such random walks will be disallowed because of forbidden overlaps. For

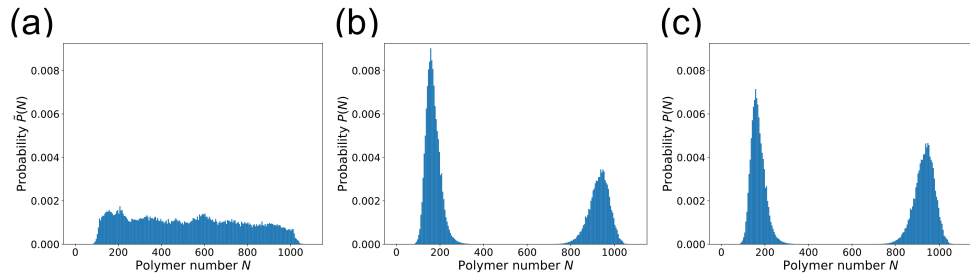

**Figure 6.** Multicanonical sampling makes it possible to determine the phase boundary at temperatures substantially below  $T_c$ . (a) The polymer number distribution  $\tilde{P}(N)$  produced in a multicanonical simulation with  $\tilde{H} = H + h(N)$ . Domain sequence with  $\ell = 2$ ,  $\beta\epsilon \approx 0.94$ ,  $J = 0.05\epsilon$ . (b) The true distribution  $P(N)$ , obtained by reweighting  $\tilde{P}(N)$  from (a) to remove  $h(N)$ . (c) The distribution at the phase boundary, obtained by reweighting (b) to the chemical potential  $\mu^*$  at which both peaks have equal weight.

310 efficiency, we therefore implemented a form of Configurational-Bias Monte Carlo (CBMC)(*Frenkel*  
 311 *and Smit, 2002*). Specifically, we insert the head of a polymer at a randomly chosen site, and then  
 312 perform a biased walk along an allowed path, keeping track of the number of available choices at  
 313 each step to generate a “Rosenbluth weight”  $R$ :

$$R = \prod_{k=1}^{L-1} W_k, \quad (7)$$

314 where  $W_k$  is the number of allowed sites for monomer  $k + 1$  starting from the position of monomer  
 315  $k$ . The probability of this insertion move is therefore

$$P_{\text{insert}} = \frac{1}{V} \frac{1}{R}. \quad (8)$$

316 The CBMC algorithm satisfies detailed balance so long as the net flow of probability between  
 317 any two configurations  $x_1$  and  $x_2$  is zero. In words, this imposes the condition

$$\begin{aligned} P(\text{being in } x_1) \times P(\text{proposing } x_2) \times P(\text{accepting } x_1 \rightarrow x_2) = \\ P(\text{being in } x_2) \times P(\text{proposing } x_1) \times P(\text{accepting } x_2 \rightarrow x_1). \end{aligned} \quad (9)$$

318 In our system, if configuration  $x_1$  has polymer number  $N$  and energy  $E_N$  and  $x_2$  has polymer num-  
 319 ber  $N + 1$  and energy  $E_{N+1}$ , Eq. 9 becomes

$$P(E_N, N) \times P_{\text{insert}} \times P_{\text{acc}}(\Delta N = +1) = P(E_{N+1}, N + 1) \times P_{\text{delete}} \times P_{\text{acc}}(\Delta N = -1), \quad (10)$$

320 where  $P(E, N) = \exp(-\beta E + \beta \mu N)/Z$  is the equilibrium probability of the state. CBMC leads to the  
 321  $P_{\text{insert}}$  in Eq. 8.  $P_{\text{delete}} = 1/(N + 1)$ , because polymers are chosen randomly for deletion. This leads to  
 322 the following condition on the acceptance probabilities:

$$P_{\text{acc}}(\Delta N = +1) = \frac{VR}{N + 1} \exp\left(-\beta(E_{N+1} - E_N - \mu)\right) P_{\text{acc}}(\Delta N = -1). \quad (11)$$

323 The acceptance probabilities given below in Eq. 12 satisfy this condition and also incorporate the  
 324 multicanonical sampling described next.

325 We determine the phase diagram using histogram reweighting (*Panagiotopoulos et al., 1998*)  
 326 of  $P(N, E)$ , where  $N$  is the polymer number and  $E$  is the total system energy. This allows us to  
 327 extrapolate a histogram  $P(N, E)$  obtained at  $\beta_0, \mu_0$  to  $\tilde{P}(N, E)$  at nearby  $\beta_1, \mu_1$ . First we determine  
 328 the approximate location of the critical point, then run a sufficiently long simulation to obtain a  
 329 converged  $P(N, E)$ . We determine the exact location of the critical point by finding the  $\beta_c, \mu_c$  where  
 330  $\tilde{P}(N, E)$  matches the universal distribution known for the 3D Ising model (*Tsypin and Blöte, 2000*).  
 331 (Because polymer models lack the symmetry of the Ising model, we also must fit a “mixing paramete-  
 332 ter”  $x$  which determines the order parameter  $N - xE$  (*Wilding, 1997*)). In principle, we could find the

333 binodal at temperature  $T < T_c$  ( $\beta > \beta_c$ ) by determining  $P_\beta(N, E)$ , then reweighting the histogram to  
 334 the  $\mu^*$  at which  $P_\beta(N)$  has two peaks with equal weight. The phase boundaries  $\phi_{\text{dilute}}$  and  $\phi_{\text{dense}}$  would  
 335 then be the means of these peaks, which we could find by fitting  $P_\beta(N)$  to a Gaussian mixture model.  
 336 However, determining the relative equilibrium weights of the two phases requires observing many  
 337 transition events, which are very rare at temperatures substantially below  $T_c$ . To circumvent this dif-  
 338 ficulty, we use multicanonical sampling (*Wilding, 1997*): Once we have  $P_{\beta_c}(N, E)$  at the critical point,  
 339 we use reweighting to estimate  $\tilde{P}_{\beta_1}(N, E)$  at a slightly lower temperature  $\beta_1$ . When we perform the  
 340 new simulation at  $\beta_1$ , we use a modified Hamiltonian  $\tilde{H} = H + h(N)$ , where  $h(N) = \frac{1}{\beta_1} \log \tilde{P}_{\beta_1}(N)$ .  
 341 (Note that  $h(N)$  is only defined over the range of  $N$  between the two peaks.) This yields  $\tilde{P}_{\beta_1}(N)$ ,  
 342 which is unimodal and flat-topped with respect to  $N$  rather than bimodal, and thus allows rapid  
 343 sampling of the full range of relevant values of  $N$ . Figure 6(a) shows an example distribution  $\tilde{P}(N)$ .  
 344 Finally, we use reweighting to remove  $h(N)$  and study the true histogram  $P_{\beta_1}(N, E)$ , as in Fig. 6(b).  
 345 We apply this procedure iteratively to obtain the phase boundary at lower and lower tempera-  
 346 tures. Combining multicanonical sampling with Configurational-Bias Monte Carlo, our acceptance  
 347 probabilities become

$$P_{\text{acc}} = \begin{cases} \min\{1, \exp(-\beta\Delta H)\} & \Delta N = 0 \\ \min\left\{1, \frac{V}{N+1} \frac{R}{(z+1)^{L-1}} \exp\left(-\beta(\Delta H - \mu\Delta N) - \beta(h(N+1) - h(N))\right)\right\} & \Delta N = +1 \\ \min\left\{1, \frac{N}{V} \frac{(z+1)^{L-1}}{R} \exp\left(-\beta(\Delta H - \mu\Delta N) - \beta(h(N-1) - h(N))\right)\right\} & \Delta N = -1 \end{cases} \quad (12)$$

348 *Single-polymer properties.* The density of states  $g(s)$  is the number of configurations of an isolated  
 349 polymer with  $s$  self-bonds. We extract  $g(s)$  by performing Monte Carlo simulations of the polymer  
 350 over a range of  $\beta$  values. The distributions are then combined using the multihistogram method,  
 351 and inverted to determine the density of states (*Landau and Binder, 2014*).

## 352 Appendix 1

### 353 Mean-field theory

We aim to find the partition function  $Z$  for a system with  $N$  identical, interacting polymers on a  
 lattice with  $V$  sites. Each polymer has  $a$  A motifs,  $b$  B motifs, and length  $L = a + b$ . We label the  
 state of polymer  $i$  by the number of self-bonds  $s_i$  and trans-bonds  $t_i$ . Then the total number of  
 self-bonds is  $S \equiv \sum_i s_i$ , and the total number of trans-bonds is  $T \equiv \frac{1}{2} \sum_i t_i$ . In our approach, each  
 polymer forms self-bonds according to its own full degrees of freedom encoded in the density of  
 states  $g(s)$ . However, we approximate the inter-polymer interactions within a mean-field approach.  
 The full partition function for our system is then given by

$$Z = \sum_{\xi, T} n(\xi, T) e^{\beta\epsilon(\xi+T) + \beta\chi\phi^2} \sum_{\{S=\xi\}} \left( \prod_i^N g(s_i) \right),$$

where  $n(\xi, T)$  is the combinatorial term for counting states with  $T$  A-B overlap bonds (given  $\xi$  total  
 self-bonds) and the second sum is over all configurations where  $S = \xi$ . The parameter  $\chi$  quantifies  
 the strength of two-body nonspecific interactions, e.g. as appears in Flory-Huggins theory. We  
 make the approximation that in the thermodynamic limit,  $Z$  is dominated by the largest term:

$$Z \approx \max_{\xi, T} \left[ n(\xi, T) e^{\beta\epsilon(\xi+T) + \beta\chi\phi^2} \sum_{\{S=\xi\}} \left( \prod_i^{N_p} g(s_i) \right) \right], \quad (13)$$

$$\beta F \approx \min_{\xi, T} \left[ -\log \left( n(\xi, T) e^{\beta\epsilon(\xi+T) + \beta\chi\phi^2} \right) - \log G(\xi) \right], \quad (14)$$

354 where  $G(\xi)$  is the entropy associated with forming  $S = \xi$  self-bonds.

355 First we calculate  $n(\xi, T) = n_{\text{steric}} \times n_{\text{trans}} \cdot n_{\text{steric}}$  is the number of allowed ways to place the polymers  
 356 on the lattice and  $n_{\text{trans}}$  is the number of ways to form  $T$  trans-bonds. To find  $n_{\text{steric}}$ , we ignore chain  
 357 connectivity and simply count the number of ways of choosing  $N\langle l \rangle$  sites on a lattice with  $V$  sites,  
 358 where

$$\langle l \rangle = L - \bar{s} - \bar{t}/2 \quad (15)$$

359 is the mean number of sites occupied by a polymer. We account for excluded volume using a  
 360 semi-dilute approximation that the probability of placing monomer  $k$  successfully is the fraction of  
 361 empty sites remaining:

$$n_{\text{steric}} = \binom{V}{N} \prod_{k=N}^{N(\langle l \rangle - 1)} \frac{V - k}{V}, \quad (16)$$

362 where  $\binom{V}{N}$  counts the center-of-mass, or equivalently "polymer head," degrees of freedom. We find  
 363  $n_{\text{trans}}$  by assuming that each protein sees the others as a mean-field cloud of motifs with which it  
 364 can form A-B overlap bonds depending on the overall motif density. Then

$$n_{\text{trans}} = \binom{Na - S}{T} \binom{Nb - S}{T} T! \left( \frac{1}{V} \right)^T, \quad (17)$$

365 where the first two terms count the number of ways to choose  $T$  A motifs and  $T$  B motifs, given  
 366 that  $S$  of each are already in self-bonds.  $T!$  is the number of ways to pair the chosen motifs, and  
 367 the final term is the mean-field probability that two motifs are close enough to form a bond. (This  
 368 is simply an extension of Semenov and Rubinstein's sticker model to two sticker types on a lattice  
 369 (*Semenov and Rubinstein, 1998*.)

370 Now we calculate  $F_G(\xi) \equiv -\log G(\xi)$ , the entropy of having exactly  $S = \xi$  self-bonds. The difficulty  
 371 arises from the restricted sum: we only want to count states with the correct total number of self-  
 372 bonds. However, we can relax this restriction and require instead that  $\langle S \rangle = \xi$ . Formally, this is  
 373 equivalent to working in a "Grand Canonical Ensemble" for self-bonds, where a reservoir imposes  
 374 a chemical potential  $w$ . In the thermodynamic limit, fluctuations vanish and all ensembles yield  
 375 equivalent macrostates. Thus we can calculate  $\beta\Omega = -\log Z_{\text{gc}}$  (where  $\Omega$  is the grand potential and  
 376  $Z_{\text{gc}}$  the grand canonical partition function), and use the Legendre transform  $F_G(\xi) = \Omega + w\xi/\beta$ .

377 Calculating  $Z_{\text{gc}}$  is relatively straightforward:

$$\begin{aligned} Z_{\text{gc}} &= \sum_S e^{wS} G(S), \\ &= \left( \sum_{s_i} g(s_i) e^{ws_i} \right)^N. \end{aligned} \quad (18)$$

378 Then  $w = w(\xi)$  is fixed by requiring that  $\langle S \rangle = \xi$ . Recall that  $\bar{s} = \xi/N$ , so

$$\begin{aligned} \frac{\beta F_G}{V} &= -\frac{N}{V} \log \left( \sum_{s_i} g(s_i) e^{ws_i} \right) + w \frac{\xi}{V}, \\ &= -\frac{\phi}{L} \log \left( \sum_{s_i} g(s_i) e^{ws_i} \right) + \frac{\phi}{L} w \bar{s}, \end{aligned} \quad (19)$$

379 where  $\phi$  is the monomer density  $NL/V$ . Combining this with Eqs. 16 and 17, we obtain the full  
 380 free-energy density:

$$f \equiv \frac{\beta F}{V} = f_{\text{steric}}(\bar{s}, \bar{t}) + f_{\text{trans}}(\bar{s}, \bar{t}) + \beta\chi\phi^2 - \frac{\phi}{L} \left( \log \sum_s g(s) e^{ws} \right) + \frac{\phi}{L} w \bar{s} - \frac{\phi}{L} \beta\epsilon \left( \bar{s} + \frac{\bar{t}}{2} \right), \quad (20)$$

381 where

$$f_{\text{steric}} \equiv \frac{\phi}{L} \log \frac{\phi}{L} + \left( 1 - \phi \frac{\langle l \rangle}{L} \right) \log \left( 1 - \phi \frac{\langle l \rangle}{L} \right) + \frac{\phi}{L} \left( \langle l \rangle - 1 \right) \quad (21)$$

382 and

$$f_{\text{trans}} \equiv \frac{\phi}{L} \left( y(a) + y(b) + \frac{\bar{t}}{2} \log \frac{\bar{t}}{2} + \frac{\bar{t}}{2} (1 - \log \frac{\phi}{L}) \right), \quad (22)$$

$$y(x) \equiv (x - \bar{s} - \bar{t}/2) \log(x - \bar{s} - \bar{t}/2) - (x - \bar{s}) \log(x - \bar{s}).$$

383 At every  $\phi$ , we evaluate Eq. 20 with the average bond values  $(\bar{s}^*(\phi), \bar{t}^*(\phi))$  which minimize  $f$  and the  
 384  $w$  which fixes  $\langle s \rangle = \bar{s}$ . This yields  $f(\phi)$  which we use to calculate the binodal and spinodal curves.

385 Regarding the nonspecific interaction parameter  $\chi$ , density fluctuations make it difficult to map  
 386 the simulation  $J$  to  $\chi$ , so we simply use the mean-field relation  $\chi = -VJz/2$ , where  $z$  is the lattice co-  
 387 ordination number. This yields theoretical  $T_c$  values which differ numerically from the simulations  
 388 but accurately reproduce the sequence hierarchy.

## 389 Appendix 2

### 390 Dense-phase correlations

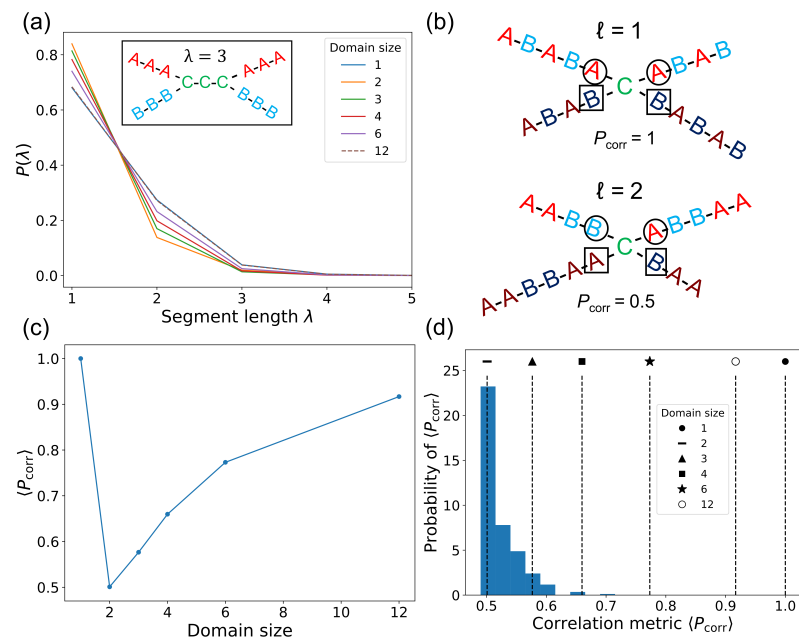

**Figure 7.** The  $\ell = 1$  polymer has correlated trans-bonds in the dense phase. (a) Probability that a trans-bond is in a segment of length  $\lambda$ , meaning it has  $\lambda$  bonds with the same partner, and all  $\lambda$  monomers are contiguous on both polymers. Data from snapshots of an NVT simulation with  $\phi = 0.3$ ,  $\beta\epsilon = 1.25$ ,  $J = 0.05\epsilon$ . Inset: A trans-bond segment of  $\lambda = 3$ , between one polymer with  $(a, b) = (9, 0)$  and another polymer with  $(a, b) = (0, 9)$ . (b) Example  $P_{\text{corr}}$  for bonds between  $\ell = 1$  (top) and  $\ell = 2$  (bottom) polymers. Motifs from polymer 1 and 2 are distinguished by lighter and darker shades, respectively. Bond-adjacent monomers are marked by circles for polymer 1 and squares for polymer 2. The pictured bond's  $P_{\text{corr}}$  is the fraction of square-circle pairs that are A-B. (c) Trans-bond correlation probability  $\langle P_{\text{corr}} \rangle$  for domain sequences, where the brackets denote averaging over initial bonds. (d) Distribution of  $\langle P_{\text{corr}} \rangle$  for 20,000 scrambled sequences with  $a = b = 12$ . Values for the domain sequences are marked.

391 From simulations, the  $\ell = 1$  sequence has a  $T_c$  between that of  $\ell = 3$  and  $\ell = 4$ , whereas the  
 392 mean-field theory predicts that  $\ell = 1$  would have a  $T_c$  very close to that for  $\ell = 2$ . Why is the  $\ell = 1$   
 393 sequence better at phase separating than the mean-field theory predicts? In the theory, sequence  
 394 only appears in  $g(s)$ , the density of states for self-bonds. We thus assume that sequence does  
 395 not directly affect inter-polymer interactions and that trans-bonds are uncorrelated. However, this  
 396 assumption neglects the fact that a bond is between two polymers. We can quantify this correlation  
 397 by looking at trans-bond “segments.” Trans-bonds are considered to be in a segment of length  $\lambda$

398 if two polymers have  $\lambda$  trans-bonds, and all involved monomers are contiguous on both polymers  
399 (Fig. 7(a) *Inset*). Essentially, trans-bond segments form when two polymers are lying on top of each  
400 other. Figure 7(a) shows the probability that each trans-bond is in a segment of length  $\lambda$  in an NVT  
401 simulation with  $\phi = 0.3$ . For all sequences, the most probable segment length is 1. However,  $\ell = 1$   
402 and  $\ell = 12$  both have relatively high probabilities of forming longer segments (these two curves  
403 overlap). As a result of these correlations, the dense phase is more favorable for these sequences  
404 than is predicted by the theory, and this leads to their higher  $T_c$  values.

405 We can quantify a sequence's tendency to form correlated segment bonds by defining a corre-  
406 lation probability  $P_{\text{corr}}$ . Consider two polymers which form a bond between monomers  $i$  and  $j$ . Now  
407 pair up neighboring monomers: the four unique possibilities are  $(i-1, j-1)$ ,  $(i-1, j+1)$ ,  $(i+1, j-1)$ ,  
408 and  $(i+1, j+1)$ .  $P_{\text{corr}}$  is the probability that these monomers will form a valid A-B bond instead  
409 of an invalid overlap. Figure 7(b) shows examples for  $\ell = 1$  and  $\ell = 2$  sequences. Every possible  
410 initial bond  $(i, j)$  has its own  $P_{\text{corr}}$ , and so we average this  $P_{\text{corr}}$  over all possible bonds. This yields  
411  $\langle P_{\text{corr}} \rangle$ , a sequence-specific metric for trans-bond correlations. Figure 7(c) shows  $\langle P_{\text{corr}} \rangle$  for the do-  
412 main sequences, and we observe that it is monotonic in domain size *except* for  $\ell = 1$ , which has a  
413  $\langle P_{\text{corr}} \rangle$  similar to  $\ell = 12$ . This explains why these two sequences have similar segment probabilities  
414 in Fig. 7(a), and why  $\ell = 1$  is better at phase separating than expected from  $g(s)$  alone. In Appendix  
415 3 below, we incorporate  $\langle P_{\text{corr}} \rangle$  into a "condensation parameter" that successfully predicts the  $T_c$   
416 hierarchy observed in simulation. Figure 7(d) shows the distribution of  $\langle P_{\text{corr}} \rangle$  for 20,000 random  
417 sequences with  $a = b = 12$ . The distribution is strongly peaked at low values, comparable to the  
418  $\ell = 2$  sequence. This suggests that the  $\ell = 1$  and  $\ell = 12$  domain sequences are atypical in their  
419 tendency to form correlated trans-bonds, so the mean-field theory that neglects these correlations  
420 should perform well for generic sequences.

### 421 Appendix 3

#### 422 Condensation parameter $\Psi$

423 Although our mean-field theory does a good job explaining sequence-driven patterns in  $T_c$ , it would  
424 be convenient to have an order parameter that is simpler to compute but that retains some of the  
425 same predictive power. According to our results, such a metric should take into account the density  
426 of states  $g(s)$ , the motif stoichiometry  $a, b$ , and the correlation metric  $\langle P_{\text{corr}} \rangle$ . Thus we propose as a  
427 metric the condensation parameter  $\Psi$ :

$$\Psi \equiv -\log \left( \frac{1}{(r_A)^b (r_B)^a} \sum_s \frac{g(s)}{(4\langle P_{\text{corr}} \rangle)^{s/2}} \right), \quad (23)$$

428 where the motif ratios are given by  $r_A = a/L$  and  $r_B = b/L$ . The role of  $g(s)$  is intuitive: the easier  
429 it is to form self-bonds, the less a polymer will tend to condense. The factor  $r_A^b r_B^a$  characterizes the  
430 probability of placing  $a$  A motifs and  $b$  B motifs in the dense phase without disallowed overlap. (The  
431 mean-field motif placement probability depends on the density  $\phi$ , but this effect is not sequence-  
432 dependent.) Finally, we normalize  $g(s)$  by the tendency to form correlated trans-bonds in the dense  
433 phase. This tendency enhances the favorability of the dense phase, and we quantify it with  $\langle P_{\text{corr}} \rangle$ .  
434 The factor of  $1/2$  in  $s/2$  is due to the fact that two trans-bonds/polymer are required to lower the  
435 energy by  $\epsilon$ /polymer, and the factor of 4 is the number of pairs of bond-adjacent monomers (Fig.  
436 7(b)). Although this metric is only heuristic, it successfully captures the  $T_c$  patterns without multi-  
437 polymer simulations (Fig. 3(c)).

438 One limitation of the condensation parameter is that it still requires knowledge of  $g(s)$  for each  
439 sequence. Is it possible to characterize the tendency of a sequence to phase separate without  
440 any simulations? In Fig. Fig. 3(c) of the main text, we replace  $\sum_s g(s)$  with a theoretical calculation  
441 of  $g(1)/g(0)$  that uses established scaling relations for the number of self-avoiding walks and the

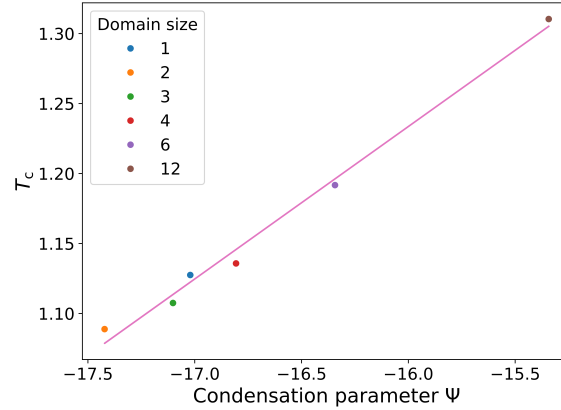

**Figure 8.** The linear fit between  $T_c$  from Monte Carlo simulations and  $\Psi$  calculated via Eq. 24. Slope=0.1089, intercept=2.9767.

442 number of self-avoiding loops (*De Gennes, 1979*). This gives

$$\begin{aligned}
 g(1) &= \sum_{\{i,j\}} \omega_{\text{walk}}(L-1) + \sum_{i,j} \omega_{\text{loop}}(|i-j|, L), \\
 \omega_{\text{walk}}(N) &= A_{\text{walk}} \mu^{N-1} (N-1)^{\gamma-1}, \\
 \omega_{\text{loop}}(N, L) &= \omega_{\text{walk}}(L-N) A_{\text{loop}} \mu^N N^{-3\nu},
 \end{aligned} \tag{24}$$

443 where  $\omega_{\text{walk}}(L-1)$  is the number of self-avoiding walks when a polymer of length  $L$  forms a contigu-  
 444 ous bond (shortening it by 1 monomer), and  $\omega_{\text{loop}}(N, L)$  counts the number of self-avoiding loops of  
 445 length  $N$ . We model the entropy of the polymer outside the loop as a self-avoiding walk of length  
 446  $L-N$ . The sums are over all possible contiguous bonds and loops, which depend on the compatibil-  
 447 ity of motifs  $i$  and  $j$ . The exponents  $\gamma = 1.157$  and  $\nu = 0.588$  are universal, and  $\mu = 10.037$  on the FCC  
 448 lattice (this coefficient  $\mu$ , which is standard notation, is not to be confused with the chemical poten-  
 449 tial  $\mu$  in our simulations). The scaling amplitudes  $A_{\text{walk}}$  and  $A_{\text{loop}}$  are not universal, so we determine  
 450 their relative magnitude by fitting to  $g(1)$  from the Monte Carlo  $g(s)$  for a single sequence. With this  
 451 one fitting parameter, we can rapidly evaluate  $\Psi$  for new sequences with no additional simulations  
 452 or calculations. Specifically, we perform a linear fit of  $\Psi$  to  $T_c$  for the domain sequences (Fig. 8)  
 453 and obtain  $T_c$  for any new sequence from its  $\Psi$  value. This procedure allows us to generate the  $T_c$   
 454 distribution in Fig. 3(d) in seconds. A Python script to calculate  $\Psi$  and  $T_c$  for arbitrary sequences is  
 455 available at <https://github.com/BenjaminWeiner/motif-sequence/tree/master/condensation%20analysis>.

456 **Appendix 4**  
457 **Additional figures**

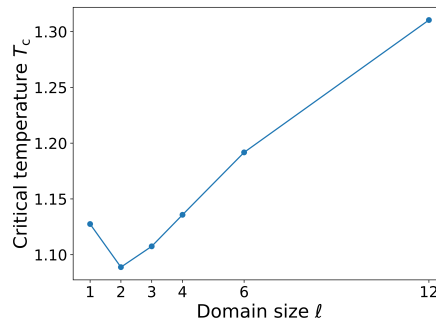

**Figure 9.** The critical temperatures of  $L = 24$  domain sequences.  $T_c$  is monotonic in domain size  $l$  except for the  $l = 1$  sequence, which has strong trans-bond correlations (see Appendix 2). Mean  $\pm$  SD over three replicates. (Temperature uncertainties are too small to see.)

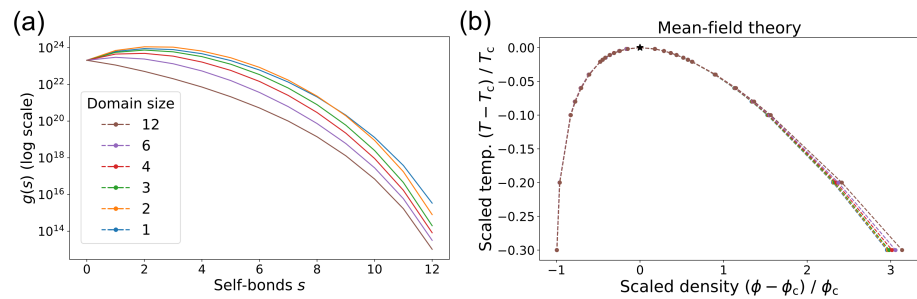

**Figure 10.** (a) The density of states  $g(s)$ , i.e. the number of ways a given sequence can form  $s$  bonds with itself, semi-log plot. Domain sequences have large differences in  $g(s)$  even for relatively rare states with large  $s$ . Domain color code applies to all panels. (b) The phase diagram from the mean-field theory, rescaled by the critical temperature  $T_c$  and critical density  $\phi_c$ .

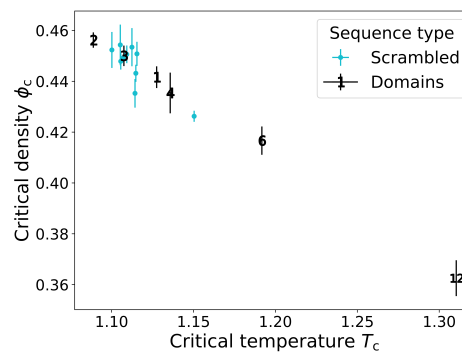

**Figure 11.** Critical temperatures and critical densities of  $L = 24$  domain sequences and scrambled sequences, all with  $a = b = 12$ . For the domain sequences, the plot markers denote domain size  $l$ . Scrambled sequences cluster around the  $l = 3$  domain sequence, motivating the use of this sequence as the starting point for stoichiometry mutations in Fig. 3(b). Mean  $\pm$  SD over three replicates. (Temperature uncertainties are too small to see.)



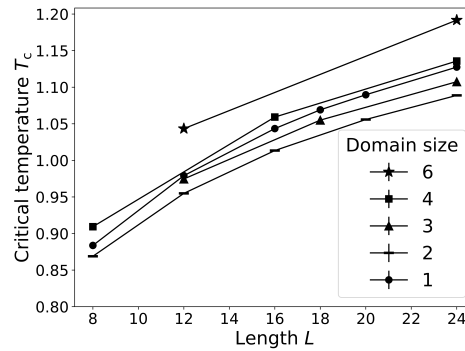

**Figure 12.**  $T_c$  as a function of length for sequences with different domain sizes. Mean  $\pm$  SD over three replicates. (Temperature uncertainties are too small to see.) The  $T_c$  hierarchy is preserved across sequence lengths. Thus domain size is a robust predictor of phase separation via its relationship with self-bond entropy.

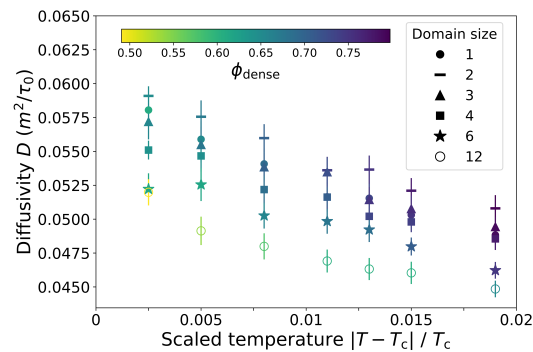

**Figure 13.** Using the “Sticky Rouse Model” for unentangled polymer dynamics in a melt with cross-links (Rubinstein and Semenov, 2001), the dense-phase diffusivity  $D = \frac{m^2}{\tau_b}$ , where  $m$  is the monomer size and  $\tau_b = \tau_0 \exp(\beta\epsilon)$  is the bond lifetime, is plotted as a function of scaled temperature. For all sequences, lower temperatures correspond to higher densities and slower polymer diffusion. Importantly, the sequences with large domain sizes and many trans-bonds (e.g.  $\ell = 12$  and  $\ell = 6$ ) have smaller  $D$ , in spite of their lower density. This coincides with the viscosity results in Fig. 4 of the main text, where the trans-bonds dominate the physical properties of the droplet. Color bar: droplet density.

## References

- 458  
459 **Alberti S**, Gladfelter A, Mittag T. Considerations and challenges in studying liquid-liquid phase separation and  
460 biomolecular condensates. *Cell*. 2019; 176(3):419–434.
- 461 **Banani SF**, Lee HO, Hyman AA, Rosen MK. Biomolecular condensates: organizers of cellular biochemistry.  
462 *Nature Reviews Molecular Cell Biology*. 2017; 18:285–298.
- 463 **Boeynaems S**, Alberti S, Fawzi NL, Mittag T, Polymenidou M, Rousseau F, Schymkowitz J, Shorter J, Wolozin B,  
464 Van Den Bosch L, Tompa P, Fuxreiter M. Protein phase separation: a new phase in cell biology. *Trends in*  
465 *Cell Biology*. 2018; 28(6):420–435.
- 466 **Brangwynne CP**, Tompa P, Pappu RV. Polymer physics of intracellular phase transitions. *Nature Physics*. 2015;  
467 11(11):899–904.
- 468 **Das RK**, Pappu RV. Conformations of intrinsically disordered proteins are influenced by linear sequence  
469 distributions of oppositely charged residues. *Proceedings of the National Academy of Sciences*. 2013;  
470 110(33):13392–13397.
- 471 **Das S**, Amin AN, Lin YH, Chan HS. Coarse-grained residue-based models of disordered protein condensates:  
472 utility and limitations of simple charge pattern parameters. *Physical Chemistry Chemical Physics*. 2018;  
473 20(45):28558–28574.
- 474 **De Gennes PG**. *Scaling concepts in polymer physics*. Cornell University Press; 1979.
- 475 **Dimchev JA**, Case LB, Rosen MK. Who's in and who's out—compositional control of biomolecular condensates.  
476 *Journal of molecular biology*. 2018; 430(23):4666–4684.
- 477 **Frenkel D**, Smit B. *Understanding Molecular Simulation: From Algorithms to Applications*. 2 ed. San Diego  
478 Academic Press; 2002.
- 479 **Hicks A**, Escobar CA, Cross TA, Zhou HX. Sequence-dependent correlated segments in the intrinsically disor-  
480 dered region of ChiZ. *Biomolecules*. 2020; 10(6):946.
- 481 **Hnisz D**, Shrinivas K, Young RA, Chakraborty AK, Sharp PA. A Phase Separation Model for Transcriptional Con-  
482 trol. *Cell*. 2017; 169:13–23.
- 483 **Hyman AA**, Weber CA, Jülicher F. Liquid-Liquid Phase Separation in Biology. *Annual Review of Cell and Devel-*  
484 *opmental Biology*. 2014; 30:39–58.
- 485 **Jain A**, Vale RD. RNA phase transitions in repeat expansion disorders. *Nature*. 2017; 546(7657):243–247.
- 486 **Landau DP**, Binder K. *A guide to Monte Carlo simulations in statistical physics*. Cambridge university press;  
487 2014.
- 488 **Langdon EM**, Qiu Y, Niaki AG, McLaughlin GA, Weidmann CA, Gerbich TM, Smith JA, Crutchley JM, Termini CM,  
489 Weeks KM, et al. mRNA structure determines specificity of a polyQ-driven phase separation. *Science*. 2018;  
490 360(6391):922–927.
- 491 **Li P**, Banjade S, Cheng HC, Kim S, Chen B, Guo L, Llaguno M, Hollingsworth JV, King DS, Banani SF, et al. Phase  
492 transitions in the assembly of multivalent signalling proteins. *Nature*. 2012; 483(7389):336–340.
- 493 **Lin YH**, Forman-Kay JD, Chan HS. Sequence-specific polyampholyte phase separation in membraneless or-  
494 ganelles. *Physical review letters*. 2016; 117(17):178101.
- 495 **McCarty J**, Delaney KT, Danielsen SP, Fredrickson GH, Shea JE. Complete phase diagram for liquid–liquid phase  
496 separation of intrinsically disordered proteins. *The journal of physical chemistry letters*. 2019; 10(8):1644–  
497 1652.
- 498 **Nott TJ**, Petsalaki E, Farber P, Jarvis D, Fussner E, Plochowitz A, Craggs TD, Bazett-Jones DP, Pawson T, Forman-  
499 Kay JD, et al. Phase transition of a disordered nuage protein generates environmentally responsive mem-  
500 braneless organelles. *Molecular cell*. 2015; 57(5):936–947.
- 501 **Pak CW**, Kosno M, Holehouse AS, Padrick SB, Mittal A, Ali R, Yunus AA, Liu DR, Pappu RV, Rosen MK. Sequence  
502 determinants of intracellular phase separation by complex coacervation of a disordered protein. *Molecular*  
503 *cell*. 2016; 63(1):72–85.

- 504 **Panagiotopoulos AZ**, Wong V, Floriano MA. Phase equilibria of lattice polymers from histogram reweighting  
505 Monte Carlo simulations. *Macromolecules*. 1998; 31(3):912-918.
- 506 **Rubinstein M**, Semenov AN. Dynamics of entangled solutions of associating polymers. *Macromolecules*. 2001;  
507 34(4):1058-1068.
- 508 **Sabari BR**, Dall'Agnese A, Boija A, Klein IA, Coffey EL, Shrinivas K, Abraham BJ, Hannett NM, Zamudio AV, Man-  
509 teiga JC, et al. Coactivator condensation at super-enhancers links phase separation and gene control. *Science*.  
510 2018; 361(6400).
- 511 **Sawle L**, Ghosh K. A theoretical method to compute sequence dependent configurational properties in charged  
512 polymers and proteins. *The Journal of chemical physics*. 2015; 143(8):08B615\_1.
- 513 **Semenov AN**, Rubinstein M. Thermoreversible gelation in solutions of associative polymers. 1. Statics. *Macro-*  
514 *molecules*. 1998; 31(4):1373-1385.
- 515 **Shin Y**, Chang YC, Lee DS, Berry J, Sanders DW, Ronceray P, Wingreen NS, Haataja M, Brangwynne CP. Liquid  
516 nuclear condensates mechanically sense and restructure the genome. *Cell*. 2018; 175(6):1481-1491.
- 517 **Statt A**, Casademunt H, Brangwynne CP, Panagiotopoulos AZ. Model for disordered proteins with strongly  
518 sequence-dependent liquid phase behavior. *The Journal of Chemical Physics*. 2020; 152(7):075101.
- 519 **Tsypin M**, Blöte H. Probability distribution of the order parameter for the three-dimensional Ising-model uni-  
520 versality class: A high-precision Monte Carlo study. *Physical Review E*. 2000; 62(1):73.
- 521 **Wang J**, Choi JM, Holehouse AS, Lee HO, Zhang X, Jahnel M, Maharana S, Lemaitre R, Pozniakovsky A, Drechsel  
522 D, et al. A molecular grammar governing the driving forces for phase separation of prion-like RNA binding  
523 proteins. *Cell*. 2018; 174(3):688-699.
- 524 **Wilding NB**. Simulation studies of fluid critical behaviour. *Journal of Physics: Condensed Matter*. 1997; 9(3):585.
- 525 **Xu B**, He G, Weiner BG, Ronceray P, Meir Y, Jonikas MC, Wingreen NS. Rigidity enhances a magic-number effect  
526 in polymer phase separation. *Nature communications*. 2020; 11(1):1-8.
- 527 **Zhang Y**, Xu B, Weiner BG, Meir Y, Wingreen NS. Decoding the physical principles of two-component biomolec-  
528 ular phase separation. *Elife*. in press; .
